# Supplementary material for: Synthesis of methyl benzoate intensified by p-toluenesulfonic acid-based deep eutectic solvents
Source: Royal Society of Chemistry journal article supplement (doi:10.1039/d4re00352g), 2024-01-01
Supplement: d4re00352g1.pdf [file d4re00352g1.pdf]

*supporting information for*

**Synthesis of Methyl Benzoate Intensified by *p*-Toluenesulfonic Acid-  
based Deep Eutectic Solvents**

**Dian Jin, Xindi Feng, Li Sun\*, Zuoxiang Zeng, Zhen Liu\***

*School of Chemical Engineering, East China University of Science and Technology, Shanghai 200237,*

*China*

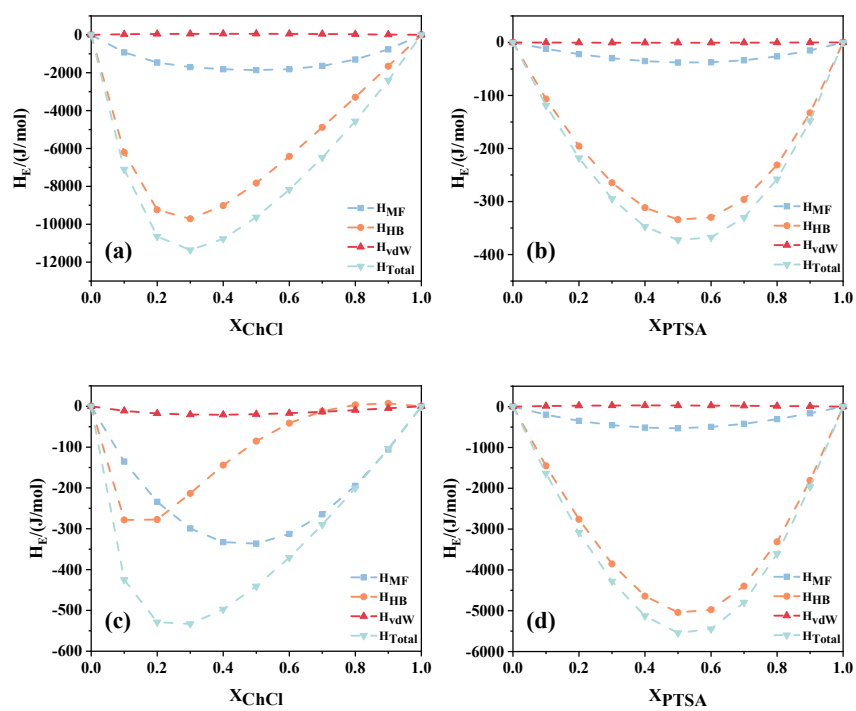

Figure S1. Excess enthalpy for the binary mixtures of ChCl (1) + BA (2) (a), PTSA (1) + BA (2) (b), ChCl (1) + MT (2) (c), and PTSA (1) + MT (2) (d) calculated by the COSMO-RS model at 298.15 K

Table S1. The activity of the components at 343.15K based on the UNIFAC method

|         | t (min) | BA       | MT       | MB       | Water    |
|---------|---------|----------|----------|----------|----------|
| 343.15K | 0       | 0.370676 | 0.681917 | 0        | 0        |
|         | 5       | 0.326909 | 0.645186 | 0.071496 | 0.104937 |
|         | 10      | 0.289625 | 0.61313  | 0.135137 | 0.193017 |
|         | 15      | 0.274395 | 0.599825 | 0.161862 | 0.228704 |
|         | 20      | 0.2615   | 0.588463 | 0.184821 | 0.258804 |
|         | 25      | 0.20945  | 0.541671 | 0.280574 | 0.37945  |
|         | 30      | 0.187726 | 0.521695 | 0.321987 | 0.429508 |
|         | 50      | 0.15461  | 0.49073  | 0.386727 | 0.505649 |
|         | 70      | 0.11542  | 0.453291 | 0.465781 | 0.595729 |
|         | 90      | 0.099019 | 0.437371 | 0.499621 | 0.633498 |
|         | 120     | 0.089291 | 0.42786  | 0.519892 | 0.655933 |
|         | 180     | 0.066283 | 0.405166 | 0.568419 | 0.709143 |
|         | 240     | 0.067396 | 0.40627  | 0.566053 | 0.706563 |
|         | 300     | 0.058967 | 0.397892 | 0.584014 | 0.726115 |
| K       |         |          | 18.07    |          |          |

Table S2. The activity of the components at 353.15K based on the UNIFAC method

|         | t (min) | BA       | MT        | MB       | Water    |
|---------|---------|----------|-----------|----------|----------|
| 353.15K | 0       | 0.370963 | 0.684604  | 0        | 0        |
|         | 5       | 0.270558 | 0.598097  | 0.169007 | 0.238285 |
|         | 10      | 0.206362 | 0.540234  | 0.285917 | 0.386766 |
|         | 15      | 0.184624 | 0.520183  | 0.327027 | 0.436607 |
|         | 20      | 0.166933 | 0.503697  | 0.361033 | 0.477057 |
|         | 25      | 0.139622 | 0.477957  | 0.414468 | 0.539371 |
|         | 30      | 0.131931 | 0.470646  | 0.429716 | 0.556903 |
|         | 50      | 0.088848 | 0.4292098 | 0.516657 | 0.655102 |
|         | 70      | 0.068045 | 0.408926  | 0.559509 | 0.7026   |
|         | 90      | 0.05081  | 0.391997  | 0.595401 | 0.742035 |
|         | 120     | 0.051424 | 0.392602  | 0.594118 | 0.74063  |
|         | 180     | 0.040354 | 0.381676  | 0.617336 | 0.766012 |
|         | 240     | 0.029985 | 0.3714056 | 0.639199 | 0.789832 |
|         | 300     | 0.022146 | 0.3636190 | 0.655798 | 0.807875 |
| K       |         |          | 65.79     |          |          |

Table S3. The activity of the components at 363.15K based on the UNIFAC method

|         | t (min) | BA       | MT       | MB       | Water    |
|---------|---------|----------|----------|----------|----------|
| 363.15K | 0       | 0.372911 | 0.685397 | 0        | 0        |
|         | 5       | 0.288427 | 0.612118 | 0.140691 | 0.201721 |
|         | 10      | 0.163778 | 0.498381 | 0.368023 | 0.489432 |
|         | 15      | 0.147739 | 0.483288 | 0.398856 | 0.52592  |
|         | 20      | 0.131919 | 0.468309 | 0.429585 | 0.561842 |
|         | 25      | 0.116645 | 0.453764 | 0.459540 | 0.596477 |
|         | 30      | 0.098535 | 0.436418 | 0.495406 | 0.637508 |
|         | 50      | 0.070638 | 0.409508 | 0.551329 | 0.700684 |
|         | 70      | 0.03848  | 0.378247 | 0.616685 | 0.773583 |
|         | 90      | 0.03223  | 0.372146 | 0.629485 | 0.787774 |
|         | 120     | 0.022764 | 0.362895 | 0.648920 | 0.809282 |
|         | 180     | 0.017064 | 0.357317 | 0.660652 | 0.822246 |
|         | 240     | 0.012314 | 0.352665 | 0.670443 | 0.833057 |
|         | 300     | 0.00961  | 0.350016 | 0.676022 | 0.839214 |
|         | K       |          |          | 168.67   |          |

Table S4. The activity of the components at 1:1(MT/BA) based on the UNIFAC method

|       | t (min) | BA       | MT       | MB       | Water     |
|-------|---------|----------|----------|----------|-----------|
|       | 0       | 0.529034 | 0.534071 | 0        | 0         |
|       | 5       | 0.385887 | 0.392539 | 0.214295 | 0.4336865 |
|       | 10      | 0.345269 | 0.351058 | 0.278861 | 0.556596  |
|       | 15      | 0.316528 | 0.321477 | 0.325407 | 0.643787  |
|       | 20      | 0.29102  | 0.29512  | 0.367250 | 0.721405  |
|       | 25      | 0.273805 | 0.277302 | 0.395747 | 0.773945  |
| MT/BA | 30      | 0.220200 | 0.253903 | 0.433436 | 0.843155  |
| 1:1   | 50      | 0.211422 | 0.212834 | 0.500382 | 0.965687  |
|       | 70      | 0.183463 | 0.184175 | 0.547765 | 1.052454  |
|       | 90      | 0.166440 | 0.166861 | 0.576688 | 1.105576  |
|       | 120     | 0.163955 | 0.164344 | 0.580912 | 1.113350  |
|       | 180     | 0.139688 | 0.13993  | 0.622168 | 1.189548  |
|       | 240     | 0.140851 | 0.141093 | 0.620192 | 1.185884  |
|       | 300     | 0.130225 | 0.130504 | 0.638242 | 1.219400  |
| K     |         |          | 45.79    |          |           |

Table S5. The activity of the components at 3:1(MT/BA) based on the UNIFAC method

|       | t (min) | BA       | MT       | MB       | Water    |
|-------|---------|----------|----------|----------|----------|
|       | 0       | 0.284804 | 0.762384 | 0        | 0        |
|       | 5       | 0.211361 | 0.70358  | 0.135440 | 0.151085 |
|       | 10      | 0.182656 | 0.679803 | 0.191827 | 0.208520 |
|       | 15      | 0.132802 | 0.637362 | 0.294491 | 0.306485 |
|       | 20      | 0.126029 | 0.63148  | 0.308906 | 0.319641 |
|       | 25      | 0.115441 | 0.622228 | 0.331664 | 0.340140 |
| MT/BA | 30      | 0.092372 | 0.601824 | 0.382201 | 0.384552 |
| 3:1   | 50      | 0.054659 | 0.56773  | 0.467611 | 0.456527 |
|       | 70      | 0.043349 | 0.557325 | 0.493892 | 0.477989 |
|       | 90      | 0.034078 | 0.548732 | 0.515663 | 0.495548 |
|       | 120     | 0.026741 | 0.541892 | 0.533036 | 0.509426 |
|       | 180     | 0.017858 | 0.533563 | 0.554238 | 0.526209 |
|       | 240     | 0.012646 | 0.528652 | 0.566763 | 0.536048 |
|       | 300     | 0.008953 | 0.525162 | 0.575676 | 0.543016 |
| K     |         |          | 66.48    |          |          |

Table S6. The activity of the components at 50 wt% based on UNIFAC method

|           | t (min) | BA       | MT       | MB       | Water    |
|-----------|---------|----------|----------|----------|----------|
|           | 0       | 0.371467 | 0.68414  | 0        | 0        |
|           | 5       | 0.279794 | 0.605317 | 0.153550 | 0.218077 |
|           | 10      | 0.206878 | 0.539725 | 0.285729 | 0.387082 |
|           | 15      | 0.17504  | 0.510273 | 0.346148 | 0.460094 |
|           | 20      | 0.170901 | 0.506408 | 0.35412  | 0.469565 |
|           | 25      | 0.158357 | 0.494646 | 0.378439 | 0.498238 |
| DES       | 30      | 0.159021 | 0.49527  | 0.377147 | 0.496723 |
| dosage 50 | 50      | 0.086979 | 0.426355 | 0.52117  | 0.661137 |
| wt%       | 70      | 0.076739 | 0.41638  | 0.54221  | 0.684537 |
|           | 90      | 0.078916 | 0.418505 | 0.537726 | 0.67956  |
|           | 120     | 0.079388 | 0.418965 | 0.536755 | 0.678481 |
|           | 180     | 0.077029 | 0.416663 | 0.541612 | 0.683873 |
|           | 240     | 0.079388 | 0.418965 | 0.536755 | 0.678481 |
|           | 300     | 0.079388 | 0.418965 | 0.536755 | 0.678481 |
| K         |         |          | 10.95    |          |          |



Table S7. The activity of the components at 150 wt% based on UNIFAC method

|            | t (min) | BA       | MT       | MB       | Water    |
|------------|---------|----------|----------|----------|----------|
|            | 0       | 0.371266 | 0.684325 | 0        | 0        |
|            | 5       | 0.315919 | 0.637221 | 0.091029 | 0.132511 |
|            | 10      | 0.281458 | 0.607159 | 0.150316 | 0.213637 |
|            | 15      | 0.203263 | 0.5368   | 0.292197 | 0.394785 |
|            | 20      | 0.164863 | 0.501157 | 0.365495 | 0.482736 |
|            | 25      | 0.136699 | 0.474571 | 0.420692 | 0.547024 |
| DES        | 30      | 0.120922 | 0.45952  | 0.452119 | 0.583002 |
| dosage 150 | 50      | 0.057577 | 0.398026 | 0.58166  | 0.727650 |
| wt%        | 70      | 0.050386 | 0.390948 | 0.596673 | 0.744127 |
|            | 90      | 0.037506 | 0.378225 | 0.623705 | 0.773690 |
|            | 120     | 0.018533 | 0.359388 | 0.663823 | 0.817373 |
|            | 180     | 0.014363 | 0.355234 | 0.672685 | 0.826998 |
|            | 240     | 0.014004 | 0.354876 | 0.67345  | 0.827828 |
|            | 300     | 0.012567 | 0.353443 | 0.676508 | 0.831149 |
| K          |         |          | 126.60   |          |          |

Table S8. The activity of the components at 343.15K based on the COSMO-RS method

|         | t (min) | BA       | MT       | MB       | Water    |
|---------|---------|----------|----------|----------|----------|
|         | 0       | 0.231324 | 0.614832 | 0        | 0        |
|         | 5       | 0.196731 | 0.592142 | 0.091211 | 0.079679 |
|         | 10      | 0.168646 | 0.571463 | 0.167586 | 0.150160 |
|         | 15      | 0.157554 | 0.562639 | 0.198399 | 0.179646 |
|         | 20      | 0.148340 | 0.554992 | 0.224302 | 0.204925 |
|         | 25      | 0.112846 | 0.522405 | 0.326999 | 0.309889 |
|         | 30      | 0.098863 | 0.507958 | 0.368908 | 0.355062 |
| 343.15K | 50      | 0.078521 | 0.484929 | 0.431613 | 0.425426 |
|         | 70      | 0.056012 | 0.456053 | 0.503826 | 0.510930 |
|         | 90      | 0.047106 | 0.443431 | 0.533360 | 0.547391 |
|         | 120     | 0.041970 | 0.435793 | 0.550675 | 0.569192 |
|         | 180     | 0.030257 | 0.417271 | 0.591010 | 0.621255 |
|         | 240     | 0.030809 | 0.418181 | 0.589080 | 0.618721 |
|         | 300     | 0.026662 | 0.411245 | 0.603649 | 0.637949 |
| K       |         |          | 35.12    |          |          |

Table S9. The activity of the components at 353.15K based on the COSMO-RS method

|         | t (min) | BA       | MT       | MB       | Water    |
|---------|---------|----------|----------|----------|----------|
| 353.15K | 0       | 0.240539 | 0.621395 | 0        | 0        |
|         | 5       | 0.161759 | 0.563954 | 0.198832 | 0.186118 |
|         | 10      | 0.116286 | 0.522493 | 0.320613 | 0.313736 |
|         | 15      | 0.101826 | 0.507556 | 0.360725 | 0.358424 |
|         | 20      | 0.090424 | 0.495054 | 0.392909 | 0.395320 |
|         | 25      | 0.073479 | 0.475136 | 0.441735 | 0.453170 |
|         | 30      | 0.068854 | 0.469389 | 0.455289 | 0.469650 |
|         | 50      | 0.044165 | 0.436078 | 0.529519 | 0.563387 |
|         | 70      | 0.032999 | 0.419308 | 0.564277 | 0.609441 |
|         | 90      | 0.024126 | 0.405077 | 0.592506 | 0.647939 |
|         | 120     | 0.024436 | 0.405588 | 0.591510 | 0.646564 |
|         | 180     | 0.018913 | 0.396295 | 0.609373 | 0.671434 |
|         | 240     | 0.013869 | 0.387476 | 0.625901 | 0.694825 |
|         | 300     | 0.010140 | 0.380737 | 0.638264 | 0.712565 |
| K       |         |          | 117.80   |          |          |

Table S10. The activity of the components at 363.15K based on the COSMO-RS method

|         | t (min) | BA       | MT       | MB       | Water    |
|---------|---------|----------|----------|----------|----------|
| 363.15K | 0       | 0.250731 | 0.625006 | 0        | 0        |
|         | 5       | 0.182120 | 0.575041 | 0.161237 | 0.154299 |
|         | 10      | 0.092606 | 0.490436 | 0.385632 | 0.401784 |
|         | 15      | 0.082220 | 0.478560 | 0.413058 | 0.435206 |
|         | 20      | 0.072246 | 0.466622 | 0.439739 | 0.468486 |
|         | 25      | 0.062874 | 0.454886 | 0.465140 | 0.500898 |
|         | 30      | 0.052094 | 0.440702 | 0.494782 | 0.539668 |
|         | 50      | 0.036211 | 0.418292 | 0.539385 | 0.600039 |
|         | 70      | 0.019005 | 0.391631 | 0.589128 | 0.670470 |
|         | 90      | 0.015800 | 0.386348 | 0.598579 | 0.684248 |
|         | 120     | 0.011033 | 0.378287 | 0.612753 | 0.705158 |
|         | 180     | 0.008213 | 0.373398 | 0.621208 | 0.717775 |
|         | 240     | 0.005892 | 0.369304 | 0.628206 | 0.728302 |
|         | 300     | 0.004583 | 0.366966 | 0.632170 | 0.734299 |
| K       |         |          | 276.00   |          |          |

Table S11. The activity of the components at 1:1(MT/BA) based on the COSMO-RS method

|       | t (min) | BA       | MT       | MB       | Water    |
|-------|---------|----------|----------|----------|----------|
|       | 0       | 0.409790 | 0.427426 | 0        | 0        |
|       | 5       | 0.271177 | 0.345022 | 0.234862 | 0.315022 |
|       | 10      | 0.235039 | 0.318139 | 0.298672 | 0.413953 |
|       | 15      | 0.210434 | 0.298091 | 0.342921 | 0.486564 |
|       | 20      | 0.189296 | 0.279559 | 0.381524 | 0.552820 |
|       | 25      | 0.175415 | 0.266648 | 0.407206 | 0.598496 |
| MT/BA | 30      | 0.157671 | 0.249190 | 0.440456 | 0.659635 |
| 1:1   | 50      | 0.127806 | 0.217036 | 0.497629 | 0.770410 |
|       | 70      | 0.107885 | 0.193313 | 0.536747 | 0.850638 |
|       | 90      | 0.096197 | 0.178404 | 0.560120 | 0.900419 |
|       | 120     | 0.094519 | 0.176197 | 0.563504 | 0.907744 |
|       | 180     | 0.078513 | 0.154247 | 0.596163 | 0.980042 |
|       | 240     | 0.079264 | 0.155316 | 0.594614 | 0.976546 |
|       | 300     | 0.072459 | 0.145486 | 0.608708 | 1.008603 |
| K     |         |          | 58.24    |          |          |

Table S12. The activity of the components at 3:1(MT/BA) based on the COSMO-RS method

|       | t (min) | BA       | MT       | MB       | Water    |
|-------|---------|----------|----------|----------|----------|
|       | 0       | 0.166254 | 0.722473 | 0        | 0        |
|       | 5       | 0.116262 | 0.679117 | 0.161771 | 0.121325 |
|       | 10      | 0.097968 | 0.660833 | 0.223563 | 0.170728 |
|       | 15      | 0.067969 | 0.627154 | 0.328623 | 0.259154 |
|       | 20      | 0.064073 | 0.622383 | 0.342654 | 0.271419 |
|       | 25      | 0.058072 | 0.614829 | 0.364462 | 0.290710 |
| MT/BA | 30      | 0.045376 | 0.597958 | 0.411431 | 0.333232 |
| 3:1   | 50      | 0.025773 | 0.569131 | 0.486472 | 0.404132 |
|       | 70      | 0.020180 | 0.560180 | 0.508522 | 0.425710 |
|       | 90      | 0.015696 | 0.552735 | 0.526431 | 0.443501 |
|       | 120     | 0.012211 | 0.546774 | 0.540496 | 0.457643 |
|       | 180     | 0.008069 | 0.539477 | 0.557394 | 0.474838 |
|       | 240     | 0.005679 | 0.535153 | 0.567240 | 0.484962 |
|       | 300     | 0.004002 | 0.532071 | 0.574185 | 0.492151 |
| K     |         |          | 132.70   |          |          |

Table S13. The activity of the components at 50 wt% based on the COSMO-RS method

|           | t (min) | BA       | MT       | MB       | Water    |
|-----------|---------|----------|----------|----------|----------|
|           | 0       | 0.241011 | 0.620788 | 0        | 0        |
|           | 5       | 0.168662 | 0.568702 | 0.181809 | 0.169369 |
|           | 10      | 0.116653 | 0.521916 | 0.320409 | 0.313901 |
|           | 15      | 0.095622 | 0.499885 | 0.378913 | 0.379636 |
|           | 20      | 0.092966 | 0.496947 | 0.386421 | 0.388295 |
|           | 25      | 0.085028 | 0.487938 | 0.409027 | 0.414688 |
| DES       | 30      | 0.085444 | 0.488418 | 0.407838 | 0.413287 |
| dosage 50 | 50      | 0.043146 | 0.433621 | 0.533223 | 0.568981 |
| wt%       | 70      | 0.037608 | 0.425398 | 0.550375 | 0.591637 |
|           | 90      | 0.038776 | 0.427155 | 0.546743 | 0.586810 |
|           | 120     | 0.039029 | 0.427535 | 0.545955 | 0.585764 |
|           | 180     | 0.037764 | 0.425632 | 0.549892 | 0.590993 |
|           | 240     | 0.039029 | 0.427535 | 0.545955 | 0.585764 |
|           | 300     | 0.039029 | 0.427535 | 0.545955 | 0.585764 |
| K         |         |          | 19.17    |          |          |

Table S14. The activity of the components at 150 wt% based on the COSMO-RS method

|            | t (min) | BA       | MT       | MB       | Water    |
|------------|---------|----------|----------|----------|----------|
|            | 0       | 0.240822 | 0.621031 | 0.000000 | 0.000000 |
|            | 5       | 0.196278 | 0.590439 | 0.110688 | 0.100575 |
|            | 10      | 0.169896 | 0.570073 | 0.178228 | 0.165746 |
|            | 15      | 0.114206 | 0.519836 | 0.326817 | 0.320796 |
|            | 20      | 0.089119 | 0.493006 | 0.397057 | 0.400449 |
|            | 25      | 0.071719 | 0.472388 | 0.447278 | 0.460243 |
| DES        | 30      | 0.062352 | 0.460485 | 0.474900 | 0.494218 |
| dosage 150 | 50      | 0.027570 | 0.410112 | 0.581787 | 0.633715 |
| wt%        | 70      | 0.023914 | 0.404133 | 0.593487 | 0.649825 |
|            | 90      | 0.017515 | 0.393291 | 0.614213 | 0.678801 |
|            | 120     | 0.008447 | 0.377015 | 0.644182 | 0.721733 |
|            | 180     | 0.006511 | 0.373389 | 0.650677 | 0.731204 |
|            | 240     | 0.006345 | 0.373076 | 0.651236 | 0.732021 |
|            | 300     | 0.005683 | 0.371821 | 0.653466 | 0.735289 |
| K          |         |          | 227.39   |          |          |



Table S15. The experimental and calculated MB yield at different temperatures based on the UNIFAC method

|     | MB yield         |                  |                  |                  |                  |                  |
|-----|------------------|------------------|------------------|------------------|------------------|------------------|
|     | 343.15K          |                  | 353.15K          |                  | 363.15K          |                  |
|     | $Y_{\text{exp}}$ | $Y_{\text{cal}}$ | $Y_{\text{exp}}$ | $Y_{\text{cal}}$ | $Y_{\text{exp}}$ | $Y_{\text{cal}}$ |
| 0   | 0                | 0                | 0                | 0                | 0                | 0                |
| 5   | 0.1128           | 0.1018           | 0.2623           | 0.1777           | 0.2205           | 0.2128           |
| 10  | 0.21             | 0.1887           | 0.4336           | 0.3121           | 0.5536           | 0.3659           |
| 15  | 0.25             | 0.2633           | 0.4922           | 0.4168           | 0.597            | 0.4803           |
| 20  | 0.284            | 0.3277           | 0.5401           | 0.5001           | 0.6399           | 0.5679           |
| 25  | 0.4225           | 0.3840           | 0.6144           | 0.5675           | 0.6814           | 0.6370           |
| 30  | 0.4809           | 0.4328           | 0.6354           | 0.6226           | 0.7307           | 0.6919           |
| 50  | 0.5706           | 0.5766           | 0.7536           | 0.7654           | 0.8068           | 0.8285           |
| 70  | 0.6778           | 0.6662           | 0.811            | 0.84             | 0.8947           | 0.8955           |
| 90  | 0.723            | 0.7234           | 0.8587           | 0.8812           | 0.9118           | 0.9303           |
| 120 | 0.7499           | 0.7744           | 0.857            | 0.9128           | 0.9377           | 0.9555           |
| 180 | 0.8138           | 0.8169           | 0.8877           | 0.9335           | 0.9533           | 0.9705           |
| 240 | 0.8107           | 0.8301           | 0.9165           | 0.9377           | 0.9663           | 0.9735           |
| 300 | 0.8342           | 0.8340           | 0.9383           | 0.9389           | 0.9737           | 0.9738           |

Table S16. The experimental and calculated MB yield at different ratios based on the UNIFAC method

|     | MB yield         |                  |                  |                  |
|-----|------------------|------------------|------------------|------------------|
|     | 1:1              |                  | 3:1              |                  |
|     | $Y_{\text{exp}}$ | $Y_{\text{cal}}$ | $Y_{\text{exp}}$ | $Y_{\text{cal}}$ |
| 0   | 0                | 0                | 0                | 0                |
| 5   | 0.2688           | 0.1449           | 0.2464           | 0.1752           |
| 10  | 0.3456           | 0.2517           | 0.3448           | 0.3118           |
| 15  | 0.4              | 0.3334           | 0.5186           | 0.4200           |
| 20  | 0.4483           | 0.3977           | 0.5425           | 0.5076           |
| 25  | 0.4809           | 0.4495           | 0.58             | 0.5787           |
| 30  | 0.5237           | 0.4918           | 0.6623           | 0.6378           |
| 50  | 0.599            | 0.6026           | 0.7986           | 0.7909           |
| 70  | 0.6519           | 0.6620           | 0.8399           | 0.8701           |
| 90  | 0.6841           | 0.696            | 0.8739           | 0.9127           |
| 120 | 0.6888           | 0.7249           | 0.9009           | 0.9437           |
| 180 | 0.7347           | 0.7462           | 0.9337           | 0.9626           |
| 240 | 0.7325           | 0.7518           | 0.953            | 0.9658           |
| 300 | 0.7526           | 0.7532           | 0.9667           | 0.9666           |

Table S17. The experimental and calculated MB yield at different DES dosages based on the UNIFAC method

|     | MB yield   |           |             |           |
|-----|------------|-----------|-------------|-----------|
|     | DES 50 wt% |           | DES 150 wt% |           |
|     | $Y_{exp}$  | $Y_{cal}$ | $Y_{exp}$   | $Y_{cal}$ |
| 0   | 0          | 0         | 0           | 0         |
| 5   | 0.2389     | 0.1711    | 0.1436      | 0.1793    |
| 10  | 0.433      | 0.3003    | 0.2341      | 0.3149    |
| 15  | 0.5188     | 0.3996    | 0.4424      | 0.4203    |
| 20  | 0.53       | 0.4771    | 0.5461      | 0.5045    |
| 25  | 0.564      | 0.5378    | 0.6227      | 0.5724    |
| 30  | 0.5622     | 0.5858    | 0.6658      | 0.6283    |
| 50  | 0.7591     | 0.6984    | 0.8401      | 0.7746    |
| 70  | 0.7873     | 0.7456    | 0.86        | 0.8527    |
| 90  | 0.7813     | 0.7657    | 0.8957      | 0.8972    |
| 120 | 0.78       | 0.7768    | 0.9484      | 0.9323    |
| 180 | 0.7865     | 0.7810    | 0.96        | 0.9573    |
| 240 | 0.78       | 0.7813    | 0.961       | 0.9633    |
| 300 | 0.78       | 0.7813    | 0.965       | 0.9648    |

Table S18. The experimental and calculated MB yield at different temperatures based on the COSMO-RS method

|     | MB yield         |                  |                  |                  |                  |                  |
|-----|------------------|------------------|------------------|------------------|------------------|------------------|
|     | 343.15K          |                  | 353.15K          |                  | 363.15K          |                  |
|     | $Y_{\text{exp}}$ | $Y_{\text{cal}}$ | $Y_{\text{exp}}$ | $Y_{\text{cal}}$ | $Y_{\text{exp}}$ | $Y_{\text{cal}}$ |
| 0   | 0                | 0                | 0                | 0                | 0                | 0                |
| 5   | 0.1128           | 0.1039           | 0.2623           | 0.1852           | 0.2205           | 0.2149           |
| 10  | 0.21             | 0.1911           | 0.4336           | 0.3212           | 0.5536           | 0.3644           |
| 15  | 0.25             | 0.2645           | 0.4922           | 0.4252           | 0.597            | 0.4740           |
| 20  | 0.284            | 0.3274           | 0.5401           | 0.5067           | 0.6399           | 0.5577           |
| 25  | 0.4225           | 0.3819           | 0.6144           | 0.5720           | 0.6814           | 0.6235           |
| 30  | 0.4809           | 0.4289           | 0.6354           | 0.6252           | 0.7307           | 0.6760           |
| 50  | 0.5706           | 0.5668           | 0.7536           | 0.7633           | 0.8068           | 0.8087           |
| 70  | 0.6778           | 0.6530           | 0.811            | 0.8363           | 0.8947           | 0.8772           |
| 90  | 0.723            | 0.7094           | 0.8587           | 0.8778           | 0.9118           | 0.9153           |
| 120 | 0.7499           | 0.7612           | 0.857            | 0.9109           | 0.9377           | 0.9456           |
| 180 | 0.8138           | 0.8082           | 0.8877           | 0.9344           | 0.9533           | 0.9669           |
| 240 | 0.8107           | 0.8247           | 0.9165           | 0.9401           | 0.9663           | 0.9720           |
| 300 | 0.8342           | 0.8307           | 0.9383           | 0.9413           | 0.9737           | 0.9732           |

Table S19. The experimental and calculated MB yield at different ratios based on the COSMO-RS method

|     | MB yield         |                  |                  |                  |
|-----|------------------|------------------|------------------|------------------|
|     | 1:1              |                  | 3:1              |                  |
|     | $Y_{\text{exp}}$ | $Y_{\text{cal}}$ | $Y_{\text{exp}}$ | $Y_{\text{cal}}$ |
| 0   | 0                | 0                | 0                | 0                |
| 5   | 0.2688           | 0.1433           | 0.2464           | 0.1780           |
| 10  | 0.3456           | 0.2501           | 0.3448           | 0.3131           |
| 15  | 0.4              | 0.3324           | 0.5186           | 0.4184           |
| 20  | 0.4483           | 0.3971           | 0.5425           | 0.5024           |
| 25  | 0.4809           | 0.4493           | 0.58             | 0.5707           |
| 30  | 0.5237           | 0.4918           | 0.6623           | 0.6266           |
| 50  | 0.599            | 0.6028           | 0.7986           | 0.7745           |
| 70  | 0.6519           | 0.6620           | 0.8399           | 0.8536           |
| 90  | 0.6841           | 0.6962           | 0.8739           | 0.8991           |
| 120 | 0.6888           | 0.7243           | 0.9009           | 0.9344           |
| 180 | 0.7347           | 0.7451           | 0.9337           | 0.9590           |
| 240 | 0.7325           | 0.7506           | 0.953            | 0.9650           |
| 300 | 0.7526           | 0.7520           | 0.9667           | 0.9662           |

Table S20. The experimental and calculated MB yield at different DES dosages based on the COSMO-RS method

|     | MB yield         |                  |                  |                  |
|-----|------------------|------------------|------------------|------------------|
|     | DES 50wt%        |                  | DES 150wt%       |                  |
|     | $Y_{\text{exp}}$ | $Y_{\text{cal}}$ | $Y_{\text{exp}}$ | $Y_{\text{cal}}$ |
| 0   | 0                | 0                | 0                | 0                |
| 5   | 0.2389           | 0.1720           | 0.1436           | 0.1808           |
| 10  | 0.433            | 0.2993           | 0.2341           | 0.3137           |
| 15  | 0.5188           | 0.3957           | 0.4424           | 0.4155           |
| 20  | 0.53             | 0.4702           | 0.5461           | 0.4957           |
| 25  | 0.564            | 0.5285           | 0.6227           | 0.5606           |
| 30  | 0.5622           | 0.5750           | 0.6658           | 0.6138           |
| 50  | 0.7591           | 0.6867           | 0.8401           | 0.7548           |
| 70  | 0.7873           | 0.7363           | 0.86             | 0.8323           |
| 90  | 0.7813           | 0.7591           | 0.8957           | 0.8789           |
| 120 | 0.78             | 0.7729           | 0.9484           | 0.9185           |
| 180 | 0.7865           | 0.7789           | 0.96             | 0.9507           |
| 240 | 0.78             | 0.7798           | 0.961            | 0.9606           |
| 300 | 0.78             | 0.7798           | 0.965            | 0.9636           |
